# Supplementary material for: Sugar alcohol provides imaging contrast in cancer detection
Source: PubMed Central journal article supplement (PMC6668433; doi:10.1038/s41598-019-47275-5), 2019-07-31

## Sugar alcohol provides imaging contrast in cancer detection

Puneet Bagga<sup>1</sup>, Neil Wilson<sup>1</sup>, Laurie Rich<sup>1</sup>, Francesco M. Marincola<sup>2</sup>, Mitchell D. Schnall<sup>1</sup>, Hari Hariharan<sup>1</sup>, Mohammad Haris<sup>1,2,3</sup>, Ravinder Reddy<sup>1</sup>

<sup>1</sup> Center for Magnetic Resonance and Optical Imaging, University of Pennsylvania, Philadelphia, Pennsylvania, USA

<sup>2</sup> Research Branch, Sidra Medical and Research Center, Doha, Qatar

<sup>3</sup> Laboratory Animal Research Center, Qatar University, Doha, Qatar

**Supplementary Figure 1.** MalCEST effect from 10mM maltitol phantom at 7T human scanner. The CEST imaging was performed using 3  $\mu$ T  $B_1$  and 2 sec saturation duration. Around 11% contrast was observed.

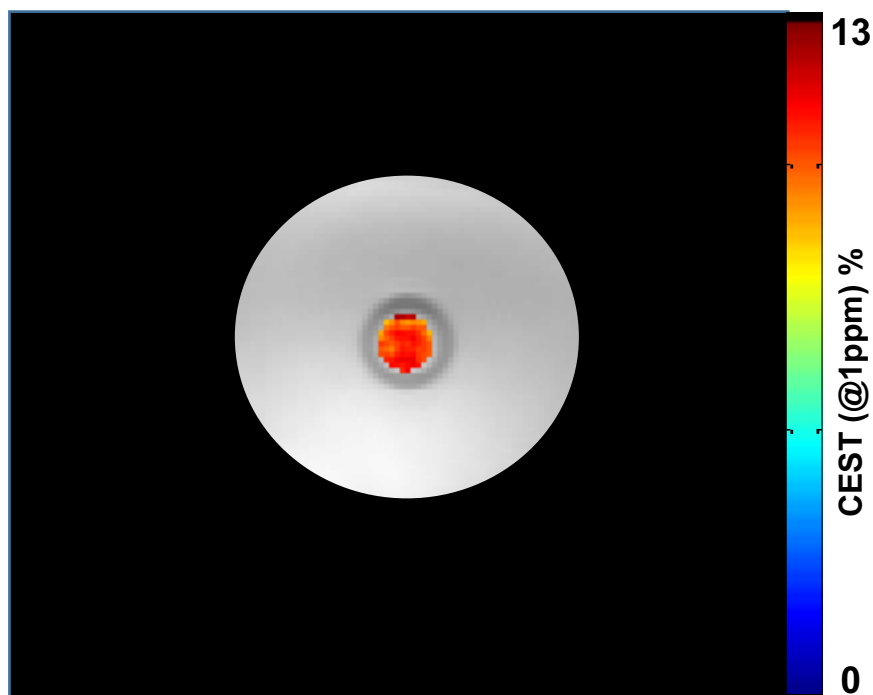

Supplement: 41598_2019_47275_MOESM1_ESM.pdf [file 41598_2019_47275_MOESM1_ESM.pdf]
